1 *Research Article*

2 **TITLE**

3 **Novel monoclonal antibodies showing broad neutralizing activity for SARS-CoV-2**  
4 **variants including Omicrons BA.5 and BA.2.75**

5

6 **Authors**

7 Hanako Ishimaru, PhD<sup>1</sup>, Mitsuhiro Nishimura, PhD<sup>1</sup>, Lidya Handayani Tjan, MD, PhD<sup>1</sup>,  
8 Silvia Sutandhio, MD<sup>1</sup>, Maria Istiqomah Marini, DDS<sup>1</sup>, Gema Barlian Effendi, MD<sup>1</sup>, Hideki  
9 Shigematsu, PhD<sup>2</sup>, Koji Kato, PhD<sup>2</sup>, Natsumi Hasegawa<sup>1</sup>, Kaito Aoki<sup>1</sup>, Yukiya Kurahashi,  
10 MD<sup>1</sup>, Koichi Furukawa, MD<sup>1</sup>, Mai Shinohara<sup>1</sup>, Tomoka Nakamura<sup>1</sup>, Jun Ariei, DVM, PhD<sup>1</sup>,  
11 Tatsuya Nagano, MD, PhD<sup>3</sup>, Sachiko Nakamura, MD<sup>4</sup>, Shigeru Sano, MD, PhD<sup>5</sup>, Sachiyo  
12 Iwata, MD, PhD<sup>6</sup>, Yasuko Mori, MD, PhD<sup>1\*</sup>

13 **Affiliations**

14 <sup>1</sup>Division of Clinical Virology, Center for Infectious Diseases, Kobe University Graduate  
15 School of Medicine, Kobe, Hyogo, Japan

16 <sup>2</sup>Structural Biology Division, Japan Synchrotron Radiation Research Institute SPring-8,  
17 Hyogo, Japan

18 <sup>3</sup>Division of Respiratory Medicine, Department of Internal Medicine, Kobe University  
19 Graduate School of Medicine, Kobe, Hyogo, Japan

20 <sup>4</sup>Division of General Internal Medicine, Hyogo Prefectural Kakogawa Medical Center,

21 Kakogawa, Hyogo, Japan

22 <sup>5</sup>Acute Care Medical Center, Hyogo Prefectural Kakogawa Medical Center, Kakogawa,  
23 Hyogo, Japan

24 <sup>6</sup>Division of Cardiovascular Medicine, Hyogo Prefectural Kakogawa Medical Center,  
25 Kakogawa, Hyogo, Japan

26

27 Hanako Ishimaru and Mitsuhiro Nishimura contributed to the study equally.

28

29 **Contact info**

30 **\*Corresponding author:** Prof. Yasuko Mori, Division of Clinical Virology, Center for  
31 Infectious Diseases, Kobe University Graduate School of Medicine, 7-5-1 Kusunoki-cho,  
32 Chuo-ku, Kobe, Hyogo 650-0017, Japan.

33 Email: [ymori@med.kobe-u.ac.jp](mailto:ymori@med.kobe-u.ac.jp)

34 Tel.: +81-78-382-6272 Fax: +81-78-382-6879

35

36 **Summary**

37 We identified novel neutralizing monoclonal antibodies against SARS-CoV-2 variants  
38 (including Omicron) from individuals received two doses of mRNA vaccination after they  
39 had been infected with wildtype. We named them MO1, MO2 and MO3. MO1 shows high  
40 neutralizing activity against authentic variants: D614G, Delta, BA.1, BA.1.1, BA.2, and  
41 BA.2.75 and BA.5. Our findings confirm that the wildtype-derived vaccination can induce  
42 neutralizing antibodies that recognize the epitopes conserved among the SARS-CoV-2  
43 variants (including BA.5 and BA.2.75). The monoclonal antibodies obtained herein could  
44 serve as novel prophylaxis and therapeutics against not only current SARS-CoV-2 viruses but  
45 also future variants that may arise.

46

47 **Keywords**

48 Severe acute respiratory syndrome-coronavirus 2 (SARS-CoV-2), Omicron variants, human  
49 monoclonal antibody, broadly neutralizing activity, spike, vaccine

50

51 **Introduction**

52 Severe acute respiratory syndrome-coronavirus 2 (SARS-CoV-2) caused the explosive  
53 Coronavirus disease 2019 (COVID-19) pandemic that began in 2019; SARS-CoV-2 has

54 infected over 577 million people worldwide and is responsible for more than 6.4 million  
55 deaths as of August 4, 2022 (<https://covid19.who.int/>). The Omicron variant (BA.1;  
56 B.1.1.529) of SARS-CoV-2 was first reported in South Africa in November 2021 and had  
57 spread worldwide  
58 (<https://www.cdc.gov/coronavirus/2019-ncov/variants/Omicron-variant.html>) (Dejnirattisai et  
59 al., 2022). The spread of the Omicron variant has caused an increase of COVID-19 infections,  
60 and the Omicron BA.5 variant has spread worldwide (Tegally et al., 2022). We and other  
61 research groups have shown that three doses of the mRNA vaccine can protect individuals  
62 against the BA.1 and BA.2 variants of SARS-CoV-2 (Muik et al., 2022) (Furukawa et al.,  
63 2022) (Tjan et al., 2022). We have also observed that neutralizing antibodies against Omicron  
64 variants are increased in the sera of individuals received a two-dose mRNA vaccine after they  
65 had been infected with wildtype SARS-CoV-2 (D614G) (Kurahashi et al., 2022a). We  
66 therefore screened and searched those individuals' B cells, as we suspected that it is possible  
67 that these B cells could produce antibodies that have broad neutralizing activity against  
68 SARS-CoV-2 variants including Omicron BA.5. In the present study, we identified three  
69 novel monoclonal antibodies (mAbs) that are broadly effective against SARS-CoV-2 variants  
70 including Omicron BA.5.

71

72 **RESULTS**

73 **B cells that produce antibodies with broad neutralizing activity against SARS-CoV-2**  
74 **were obtained from the PBMCs of SARS-CoV-2-infected, and subsequently**  
75 **two-dose-vaccinated patients**

76 To isolate mAbs targeting common epitopes of SARS-CoV-2 variants, we searched for  
77 antibody genes from PBMCs of infected and subsequently vaccinated patients. We selected  
78 three PBMCs from the patients who showed high neutralizing activity against all of the  
79 D614G, Delta, and Omicron BA.1 variants previously we reported (Kurahashi et al., 2022a).  
80 In the single B cells isolated from the PBMCs, ten antibody genes were further selected based  
81 on the ELISA findings of Fabs produced by the Ecobody technology (Ojima-Kato et al.,  
82 2017), and we tested the purified recombinant IgG antibodies with the V genes. Ten mAbs  
83 were examined for neutralizing activity, and we used the three (which we named MO1, MO2,  
84 and MO3) that showed neutralizing activity in the present study.

85

86 **Broadly neutralizing mAbs against SARS-CoV-2 variants**

87 As depicted in Figure 1, we observed that the three neutralizing mAbs for D614G, i.e., MO1,  
88 MO2, and MO3, they recognize the SARS-CoV-2 spike protein of D614G. MO1 recognized  
89 the spike protein of five variants: D614G, Delta, BA.1, BA.2 and BA.5. MO2 recognized the

90 spike protein of four of these variants (not BA.5). MO3 recognized three of the variants (not  
91 Delta or BA.5). We next assessed whether these three mAbs had neutralizing activity against  
92 SARS-CoV-2 variants. As shown in Figures 1B, C and D, the mAb MO1 inhibited all five  
93 variants and BA.1.1 variant with the following  $IC_{50}$  values: D614G (23.62 ng/mL), Delta  
94 (15.84 ng/mL), BA.1 (4.0 ng/mL), BA.1.1 (10.64 ng/mL), BA.2 (20.31 ng/mL), and BA.5  
95 (15.67 ng/mL). MO2 inhibited four variants (BA.5 was the exception), with the following  
96  $IC_{50}$  values: D614G (65.81 ng/mL), Delta (88.24 ng/mL), BA.1 (17.71 ng/mL), BA.1.1  
97 (36.05 ng/mL) and BA.2 (151.2 ng/mL). MO3 suppressed three variants (Delta and BA.5  
98 were the exceptions), with the following  $IC_{50}$  values: D614G (231.57 ng/mL), BA.1 (594.63  
99 ng/mL), and BA.2 (701.95 ng/mL). Furthermore, all of three mAbs could neutralize BA.2.75  
100 as well (data not shown).

101

102 **The novel neutralizing mAb MO1 has high affinity against the SARS-CoV-2 BA.5 spike**  
103 **protein**

104 The affinity between the SARS-CoV-2 BA.2 spike protein and the MO1 and MO2 mAbs was  
105 next evaluated by the Bio-layer interferometry (BLI) method. The prefusion-stabilized BA.2  
106 spike ectodomain trimer hardly dissociated from MO1 or MO2, indicating high avidity due to  
107 multivalent binding sites on the spike trimer (data not shown). Both MO1 and MO2 showed

108 high affinity with the BA.2 spike RBD, with the dissociation constants ( $K_D$ ) of 3.3 nM and  
109 2.0 nM, respectively (Figures 2A, C). MO1 also has high affinity with the BA.5 spike RBD  
110 with the  $K_D$  of 11 nM (Figures 2B, C), whereas MO2 showed no binding to the BA.5 spike  
111 RBD, which is consistent with its loss of the neutralizing activity for BA.5.

112

## 113 **DISCUSSION**

114 The emergence of SARS-CoV-2 variants has prolonged the COVID-19 pandemic. The  
115 novel neutralizing mAb that we identified in the present study and named MO1 has strong  
116 neutralizing potency against all of the major SARS-CoV-2 variants described to date,  
117 including the Omicron BA.5 variant that is raging worldwide. The Omicron variants BA.1  
118 and BA.2 are able to escape from the majority of the known neutralizing antibodies (Ai et al.,  
119 2022; Yamasoba et al., 2022a), and the escape ability of BA.5 is strengthened due to  
120 additional mutations such as F486V around the binding site of class 1 antibodies and the  
121 mutation site L452R around the binding site of class 3 antibodies as reported (Cao et al.,  
122 2022). Indeed, the neutralizing antibody MO2 identified herein, which can strongly neutralize  
123 both BA.1 and BA.2, lost neutralizing activity for BA.5. In contrast, MO1 has maintained  
124 neutralizing activity against BA.5. A conserved epitope avoiding the position of the L452R or  
125 F486V mutation sites is expected for MO1, considering the broad neutralizing activity of

126 MO1 (Figure 1). Structural analysis by cryoelectron microscopy (cryo-EM) is under progress  
127 and the details of the MO1 epitope are under investigation.

128 It has been reported that the antibodies bebtelovimab (LY-CoV1404 (Westendorf et al.,  
129 2022)) and cilgavimab (AZD1061 (Dong et al., 2021)) have neutralizing activity against  
130 Omicron BA.1, BA.2, and BA.5, and that cilgavimab showed reduced activity against BA.5  
131 (Yamasoba et al., 2022b). The binding affinity and neutralizing function of MO1 to BA.5 are  
132 high (Figures 1, 2). Our preliminary cryo-EM analysis indicated that MO1 accesses to the  
133 RBD from the similar side as the bebtelovimab and cilgavimab, while the binding site is  
134 substantially different from them.

135 MO1 is derived from PBMCs of individuals who were infected with a SARS-CoV-2  
136 variant—presumably the wildtype with only the D614G mutation in the spike—and  
137 then received two doses of an mRNA vaccine encoding the spike gene of the ancestral  
138 SARS-CoV-2 (Kurahashi et al., 2022a). Our finding that MO1 can broadly neutralize the  
139 early SARS-CoV-2 variants and the Omicron BA.1, BA.1.1, BA.2 and BA.5 variants  
140 demonstrates that immunity against the spike with the ancestral SARS-CoV-2 RBD sequence  
141 can protect humans by inducing neutralizing antibodies, like MO1, that recognize conserved  
142 epitopes. Indeed, our serological study regarding the sustainability of the neutralizing  
143 antibodies after early SARS-CoV-2 (D614G) infection indicated that cross-reactive



144 neutralizing antibodies are sustained for >6 months, although neutralizing antibodies specific  
145 for SARS-CoV-2 (D614G) decline (Kurahashi et al., 2022a; Kurahashi et al., 2022b). It is  
146 also noteworthy that the booster dose (three-dose) vaccination using the mRNA vaccine  
147 based on wildtype SARS-CoV-2 can induce neutralizing antibodies against Omicron BA.1  
148 and BA.2 (Furukawa et al., 2022; Tjan et al., 2022).

149         It is speculated that MO1 recognizes a conserved epitope shared among SARS-CoV-2  
150 variants considering its broad neutralizing activity. Isolation of MO1 from human memory  
151 B-cells may demonstrate that target sites remain available for neutralizing antibodies even in  
152 the spike of Omicron variants. Thus, the key task to develop effective immunity against a  
153 broad range of SARS-CoV-2 variants is thus to determine how to effectively induce  
154 antibodies against the conserved epitope. One of our previous studies revealed that patients  
155 who were infected with wildtype SARS-CoV-2 and then received a two-dose mRNA  
156 vaccination acquired high neutralizing antibody titers against Omicron BA.1 (Kurahashi et al.,  
157 2022a), and the neutralizing antibodies that were isolated in the present study were derived  
158 from donors with this background. Repeated exposure to the SARS-CoV-2 spike protein,  
159 irrespective of the variation in the sequence, may induce broadly neutralizing antibodies.

160         Cao et al. reported that BA.1-derived vaccine boosters may not achieve  
161 broad-spectrum protection against new Omicron variants because Omicron may evolve

162 mutations to evade the humoral immunity elicited by BA.1 (Cao et al., 2022). In addition, all  
163 antibodies were found to be able to neutralize BA.2.75 variant newly appeared (Tan et al.,  
164 2022). The MOI binding site observed by preliminary cryoelectron micrography is distant  
165 from mutation sites of the BA.2.75 variants (data not shown).

166 Our present findings demonstrate that the booster vaccination for the wildtype can  
167 induce neutralizing antibodies that may recognize common epitopes that are conserved  
168 among SARS-CoV-2 variants. It can also be speculated that a three- or four-dose vaccination  
169 based on the wildtype may stimulate memory B cells that can produce antibodies that have  
170 common epitopes conserved, showing broad neutralizing activity, and that booster  
171 vaccinations should thus be required even for previously infected individuals. The three new  
172 monoclonal antibodies identified in the present study could serve as novel therapeutics  
173 against not only the current SARS-CoV-2 variants but also new variants that arise in the  
174 future.

175

## 176 **Acknowledgments**

177 We thank Kazuro Sugimura MD, PhD (Superintendent, Hyogo Prefectural Hospital Agency  
178 and Professor, Kobe University) for his full support of this study. We express our gratitude for  
179 the cooperation of researchers of the Division of Respiratory Medicine, Department of

180 Internal Medicine, Kobe University Graduate School of Medicine, and medical staff of  
181 Hyogo Prefectural Kakogawa Medical Center. We thank BIKEN Innovative Vaccine  
182 Research Alliance Laboratories for providing the SARS-CoV-2 B2 strain used as the D614G  
183 variant herein. We also thank the National Institute of Infectious Disease Japan for providing  
184 the SARS-CoV-2 of Pango lineages AY.122, BA.1.18, BA.1.1, BA.2, BA.2.75 and BA.5 used  
185 here as the Delta, Omicron (B.1.159) BA.1, BA.1.1, BA.2, BA2.75 and BA.5 variants,  
186 respectively. This work is partially supported by Research Support Project for Life Science  
187 and Drug Discovery (Basis for Supporting Innovative Drug Discovery and Life Science  
188 Research: BINDS) from AMED under Grant Number JP22ama121001. YK was supported by  
189 the Taniguchi Memorial Scholarship program provided by the BIKEN Foundation. SS, LHT,  
190 MI, and GB were supported by Japanese Government (Monbukagakusho: MEXT)  
191 Scholarships.

192

### 193 **Funding**

194 This work was supported by the Hyogo Prefectural Government and a grant from the  
195 Kobayashi Foundation.

196

### 197 **Author contributions:**

198 Conceptualization, HI, MN, LHT and YM.; Methodology, HI, MN, HS, KK and YM.;

199 Sample collection: TN, SN, SS and SI.; Formal analysis, HI, MN, LHT, SS, MIM, GBE, HS,  
200 KK, NH, KA, YK, KF, MS TN, JA and YM.; Funding acquisition: YM.; Project  
201 administration, HI, MN, YM.; Supervision, YM.; Writing – original draft.; HI, MN and YM.;  
202 Writing – review & editing, HI, MN and YM.

203

#### 204 **Declaration of interests**

205 The authors declare no conflicts of interest in this research.

206

#### 207 **Figure legends**

208 **Figure 1.** Identification of broadly neutralizing mAbs against SARS-CoV-2 variants. **(A)** The  
209 binding of three mAbs to the SARS-CoV-2 spike ectodomains of the D614G, Delta, BA.1,  
210 BA.2, and BA.5 variants as revealed by ELISAs. **(B)** The neutralizing activity of the three  
211 mAbs, MO1, MO2 and MO3 against D614G, Delta, BA.1, BA.1.1, BA.2 or BA.5 as  
212 evaluated by the plaque reduction neutralization test (PRNT). **(C)** The 50% inhibitory  
213 concentrations (IC<sub>50</sub>) of the mAbs MO1, MO2 and MO3 against the SARS-CoV-2 variants  
214 calculated from the above neutralization data (B) are shown. **(D)** A presentation of plaque  
215 reduction in MO1's PRNT test against BA.5.

216

217 **Figure 2.** Analysis of the affinity between the three novel mAbs and spike antigens by  
218 biolayer interferometry (BLI). **(A)** The sensorgram for the BA.2 spike RBD's binding to the  
219 mAb MO1 or MO2. *Dashed lines:* the fitting curves. **(B)** The same BLI analysis as in (A)  
220 between the BA.5 spike RBD and MO1. **(C)** Summary of the BLI kinetics evaluated from the  
221 curve fitting.

222

## 223 **Materials and Methods**

### 224 **Collection of human samples**

225 Blood samples were collected at Hyogo Prefectural Kakogawa Medical Center (Kakogawa,  
226 Japan) from patients who were infected with COVID-19 during the 5-month period of  
227 July–November 2020 and then received a two-dose messenger (m)RNA vaccine. In our  
228 earlier investigation (Kurahashi et al., 2022a), we identified the sera that had high  
229 neutralizing activity against SARS-CoV-2, and in the present study we used those patients'  
230 (donors') sera and data.

231

### 232 **Isolation of human antibodies' genes from the donors' PBMCs**

233 In order to isolate human antibody genes from the above-described donor PBMCs, the sera's  
234 memory B cells that expressed anti-SARS-CoV-2 spike Abs were screened and then sorted as

235 single cells. Next, the anti-spike reactivity of the antibody Fab domain expressed from each V  
236 gene as shown by Ecobody technology (Ojima-Kato et al., 2017) was evaluated by an ELISA  
237 (enzyme-linked immunosorbent assay) (iBody, Nagoya, Japan).

238         The sequences of the selected V genes were determined and then subcloned into  
239 human immunoglobulin (IgG) mAb-expressing vectors. We used a capillary electrophoresis  
240 (CE) sequencer (model DS3000, Hitachi High-Tech, Tokyo) to confirm the sequences.

241

#### 242 **Antibody expression and purification**

243 With polyethyleneimine and the two plasmids containing the heavy-chain and light-chain  
244 sequences of the antibodies, recombinant mAbs were expressed in HEK293T (human kidney)  
245 cells by transfection.

246         For the purification of the antibodies, we added rProtein A Sepharose<sup>®</sup> (Cytiva,  
247 Marlborough, MA) to the culture supernatant. The trapped mAbs was eluted with sodium  
248 citrate buffer (i.e., 40 mM trisodium citrate, pH 3.4). The solution was then immediately  
249 neutralized to ~pH 7.0 by the addition of 1 M Tris-HCl buffer.

250

#### 251 **Enzyme-linked immunosorbent assay (ELISA)**

252 Our earlier study (Ren et al., 2022) also describes the ELISA performed. The optical density

253 was measured at wavelength 405 nm ( $OD_{405}$ ) by a microplate photometer (Multiskan™ FC,  
254 Thermo Fisher Scientific).

255

## 256 **Viruses**

257 BIKEN Innovative Vaccine Research Alliance Laboratories (Osaka, Japan) provided the  
258 SARS-CoV-2 strain that contains the spike D614G mutation (DNA Data Bank of Japan  
259 [DDBJ]: accession no. LC644163), and in the present study we refer to this strain as strain  
260 D614G. Japan's National Institute of Infectious Disease (Tokyo) provided the SARS-CoV-2  
261 strains of the Pango lineage AY.122 (EPI\_ISL\_2158617) which we used as the Delta variant,  
262 BA.1.18 (EPI\_ISL\_7418017) which we used as the Omicron BA.1 variant, BA1.1  
263 (EPI\_ISL\_7571618) which we used as the BA1.1 variant, BA.2 (EPI\_ISL\_9595859) which  
264 we used as the BA.2 variant, BA.2.75 (EPI\_ISL\_13969765), which we used as the BA.2.75  
265 variant, and BA.5 (EPI\_13241867), which we used as the BA.5 variant. We propagated the  
266 viruses by the infection of Vero E6 (TMPRSS2) cells in 2% FBS containing DMEM  
267 (Matsuyama et al., 2020) in order to create a stock of each virus (Furukawa et al., 2021) .

268

## 269 **Plaque reduction neutralization test (PRNT)**

270 To conduct a plaque reduction neutralization test (PRNT) and determine the neutralization

271 percentage for each virus strain, we seeded Vero E6/TMPRSS2 cells ( $2 \times 10^5$  cells/well) on  
272 12-well plates (Corning) and cultivated them for 24 hr with 5% CO<sub>2</sub> at 37°C. The cell  
273 monolayers were then washed one time with DMEM (without FBS). Each antibody diluted in  
274 DMEM (without FBS) was mixed with 100 plaque forming units (PFU) of SARS-CoV-2 and  
275 incubated for 1 hr at 37°C. We then added the virus–antibody mixture to the Vero  
276 E6/TMPRSS2 cells and cultured the cells for 1 hr with 5% CO<sub>2</sub> at 37°C. After the removal of  
277 the inoculum, the infected cells were washed twice with PBS and incubated for 3–6 days at  
278 37°C with 5% CO<sub>2</sub> together with DMEM containing 2% FBS and 1.6% methylcellulose.

279 After the removal of the culture medium, PBS was used to wash the cells two times,  
280 and the cells were fixed with 80% methanol for 1 hr at room temperature. The remaining cells  
281 were stained with 1% crystal violet in 50% methanol for the visualization of plaques, which  
282 were counted manually. The ratio of neutralization was obtained by dividing the number of  
283 plaques obtained without antibody by the number of plaques obtained with antibody.

284

### 285 **Bio-layer interferometry**

286 The affinity between each antibody and spike protein was measured by bio-layer  
287 interferometry (BLI) with a BLItz Biolayer Interferometer System (Sartorius, Goettingen,  
288 Germany).



289

290 **Ethics statement**

291 The Kobe University Graduate School of Medicine's Ethics Committee approved the  
292 collection and use of the COVID-19 patients' blood samples (approval code: B200200). The  
293 patients' written informed consent for this use was obtained.

294

295 **References**

- 296 Ai, J., Wang, X., He, X., Zhao, X., Zhang, Y., Jiang, Y., Li, M., Cui, Y., Chen, Y., Qiao, R., *et*  
297 *al.* (2022). Antibody evasion of SARS-CoV-2 Omicron BA.1, BA.1.1, BA.2, and BA.3  
298 sub-lineages. *Cell Host Microbe*.
- 299 Cao, Y., Yisimayi, A., Jian, F., Song, W., Xiao, T., Wang, L., Du, S., Wang, J., Li, Q., Chen,  
300 X., *et al.* (2022). BA.2.12.1, BA.4 and BA.5 escape antibodies elicited by Omicron infection.  
301 *Nature*.
- 302 Dejnirattisai, W., Huo, J., Zhou, D., Zahradník, J., Supasa, P., Liu, C., Duyvesteyn, H.M.E.,  
303 Ginn, H.M., Mentzer, A.J., Tuekprakhon, A., *et al.* (2022). SARS-CoV-2 Omicron-B.1.1.529  
304 leads to widespread escape from neutralizing antibody responses. *Cell* 185, 467-484.e415.
- 305 Dong, J., Zost, S.J., Greaney, A.J., Starr, T.N., Dingens, A.S., Chen, E.C., Chen, R.E., Case,  
306 J.B., Sutton, R.E., Gilchuk, P., *et al.* (2021). Genetic and structural basis for SARS-CoV-2  
307 variant neutralization by a two-antibody cocktail. *Nat Microbiol* 6, 1233-1244.
- 308 Furukawa, K., Tjan, L.H., Kurahashi, Y., Sutandhio, S., Nishimura, M., Arii, J., and Mori, Y.  
309 (2022). Assessment of Neutralizing Antibody Response Against SARS-CoV-2 Variants After  
310 2 to 3 Doses of the BNT162b2 mRNA COVID-19 Vaccine. *JAMA Netw Open* 5, e2210780.
- 311 Furukawa, K., Tjan, L.H., Sutandhio, S., Kurahashi, Y., Iwata, S., Tohma, Y., Sano, S.,  
312 Nakamura, S., Nishimura, M., Arii, J., *et al.* (2021). Cross-Neutralizing Activity Against  
313 SARS-CoV-2 Variants in COVID-19 Patients: Comparison of 4 Waves of the Pandemic in  
314 Japan. *Open Forum Infect Dis* 8, ofab430.
- 315 Hsieh, C.L., Goldsmith, J.A., Schaub, J.M., DiVenere, A.M., Kuo, H.C., Javanmardi, K., Le,  
316 K.C., Wrapp, D., Lee, A.G., Liu, Y., *et al.* (2020). Structure-based design of  
317 prefusion-stabilized SARS-CoV-2 spikes. *Science* 369, 1501-1505.
- 318 Kurahashi, Y., Furukawa, K., Sutandhio, S., Tjan, L.H., Iwata, S., Sano, S., Tohma, Y., Ohkita,  
319 H., Nakamura, S., Nishimura, M., *et al.* (2022a). Cross-neutralizing activity against Omicron  
320 could be obtained in SARS-CoV-2 convalescent patients who received two doses of mRNA  
321 vaccination. *J Infect Dis*.
- 322 Kurahashi, Y., Sutandhio, S., Furukawa, K., Tjan, L.H., Iwata, S., Sano, S., Tohma, Y., Ohkita,  
323 H., Nakamura, S., Nishimura, M., *et al.* (2022b). Cross-Neutralizing Breadth and Longevity  
324 Against SARS-CoV-2 Variants After Infections. *Front Immunol* 13, 773652.
- 325 Matsuyama, S., Nao, N., Shirato, K., Kawase, M., Saito, S., Takayama, I., Nagata, N.,  
326 Sekizuka, T., Katoh, H., Kato, F., *et al.* (2020). Enhanced isolation of SARS-CoV-2 by  
327 TMPRSS2-expressing cells. *Proc Natl Acad Sci U S A* 117, 7001-7003.
- 328 Muik, A., Lui, B.G., Wallisch, A.K., Bacher, M., Muhl, J., Reinholz, J., Ozhelvaci, O.,  
329 Beckmann, N., Guimil Garcia, R.C., Poran, A., *et al.* (2022). Neutralization of SARS-CoV-2

330 Omicron by BNT162b2 mRNA vaccine-elicited human sera. *Science* 375, 678-680.

331 Niwa, H., Yamamura, K., and Miyazaki, J. (1991). Efficient selection for high-expression  
332 transfectants with a novel eukaryotic vector. *Gene* 108, 193-199.

333 Ojima-Kato, T., Nagai, S., and Nakano, H. (2017). Ecobody technology: rapid monoclonal  
334 antibody screening method from single B cells using cell-free protein synthesis for  
335 antigen-binding fragment formation. *Sci Rep* 7, 13979.

336 Ren, Z., Nishimura, M., Tjan, L.H., Furukawa, K., Kurahashi, Y., Sutandhio, S., Aoki, K.,  
337 Hasegawa, N., Arii, J., Uto, K., *et al.* (2022). Large-scale serosurveillance of COVID-19 in  
338 Japan: Acquisition of neutralizing antibodies for Delta but not for Omicron and requirement  
339 of booster vaccination to overcome the Omicron's outbreak. *PLoS One* 17, e0266270.

340 Tan, C.W., Lim, B.L., Young, B.E., Yeoh, A.Y., Yung, C.F., Yap, W.C., Althaus, T., Chia,  
341 W.N., Zhu, F., Lye, D.C., *et al.* (2022). Comparative neutralisation profile of SARS-CoV-2  
342 omicron subvariants BA.2.75 and BA.5. *Lancet Microbe*.

343 Tegally, H., Moir, M., Everatt, J., Giovanetti, M., Scheepers, C., Wilkinson, E., Subramoney,  
344 K., Moyo, S., Amoako, D.G., Baxter, C., *et al.* (2022). Continued Emergence and Evolution  
345 of Omicron in South Africa: New BA.4 and BA.5 lineages. *medRxiv*,  
346 2022.2005.2001.22274406.

347 Tjan, L.H., Furukawa, K., Kurahashi, Y., Sutandhio, S., Nishimura, M., Arii, J., and Mori, Y.  
348 (2022). As well as Omicron BA.1, high neutralizing activity against Omicron BA.2 can be  
349 induced by COVID-19 mRNA booster vaccination. *J Infect Dis*.

350 Westendorf, K., Zentelis, S., Wang, L., Foster, D., Vaillancourt, P., Wiggin, M., Lovett, E.,  
351 van der Lee, R., Hendle, J., Pustilnik, A., *et al.* (2022). LY-CoV1404 (bebtelovimab) potently  
352 neutralizes SARS-CoV-2 variants. *Cell Rep* 39, 110812.

353 Yamasoba, D., Kimura, I., Nasser, H., Morioka, Y., Nao, N., Ito, J., Uriu, K., Tsuda, M.,  
354 Zahradnik, J., Shirakawa, K., *et al.* (2022a). Virological characteristics of the SARS-CoV-2  
355 Omicron BA.2 spike. *Cell* 185, 2103-2115 e2119.

356 Yamasoba, D., Kosugi, Y., Kimura, I., Fujita, S., Uriu, K., Ito, J., and Sato, K. (2022b).  
357 Neutralisation sensitivity of SARS-CoV-2 omicron subvariants to therapeutic monoclonal  
358 antibodies. *Lancet Infect Dis* 22, 942-943.

359

360

361

**Fig. 1****A**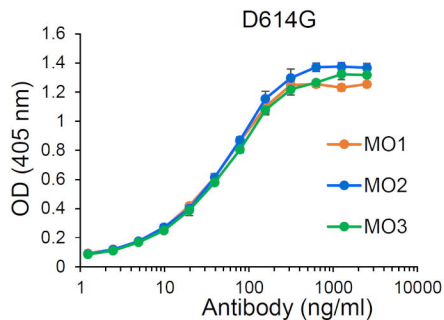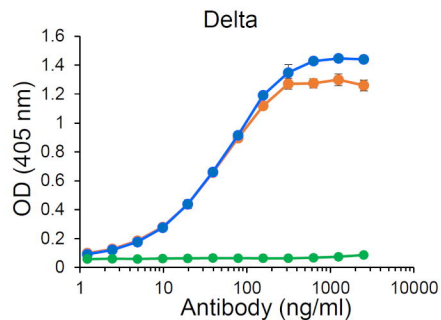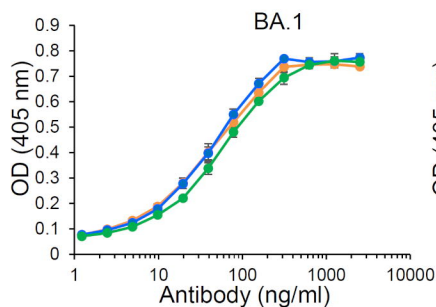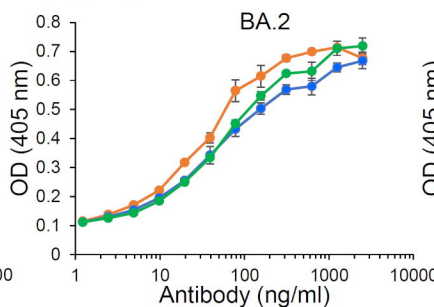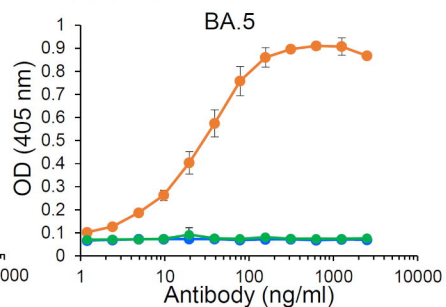**B**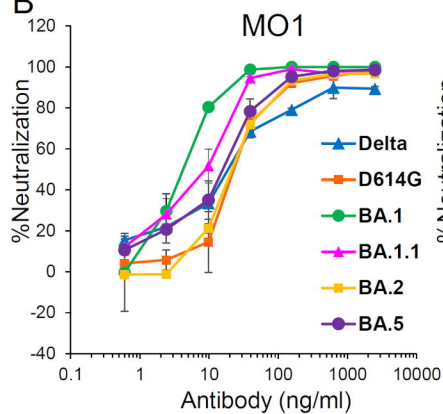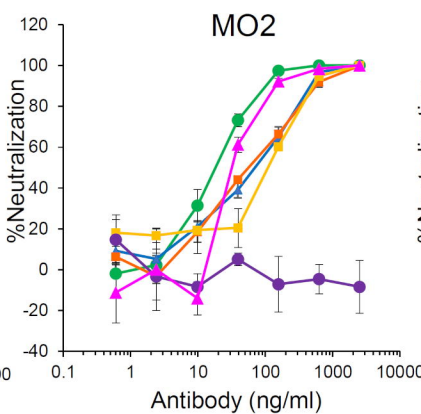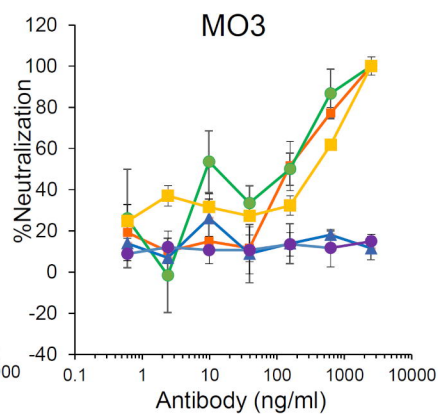**C**

| IC <sub>50</sub><br>(ng ml <sup>-1</sup> ) | D614G  | Delta | BA.1   | BA.1.1 | BA.2   | BA.5  |
|--------------------------------------------|--------|-------|--------|--------|--------|-------|
| MO1                                        | 23.62  | 15.84 | 4.00   | 10.64  | 20.31  | 15.67 |
| MO2                                        | 65.81  | 88.24 | 17.71  | 36.05  | 151.2  | -     |
| MO3                                        | 231.57 | -     | 594.63 | ND*    | 701.95 | -     |

\* ND : Not determined

**D** MO1      0      156.3      625      2500      ng/ml

BA. 5

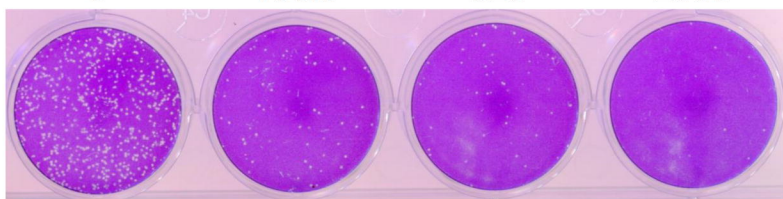

**Fig. 2****A**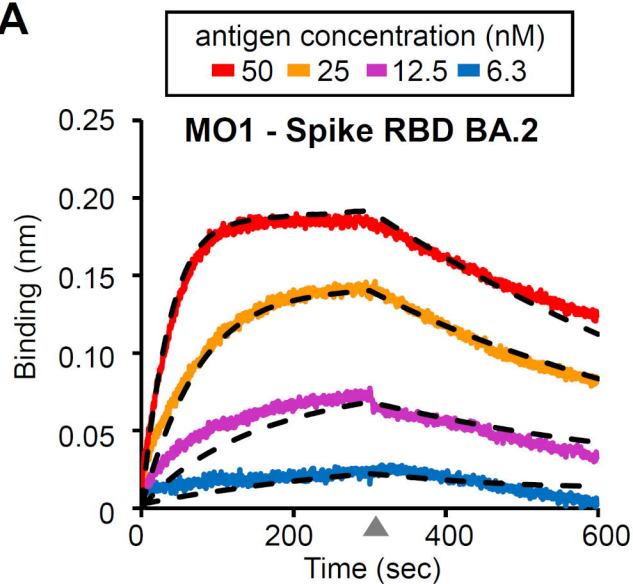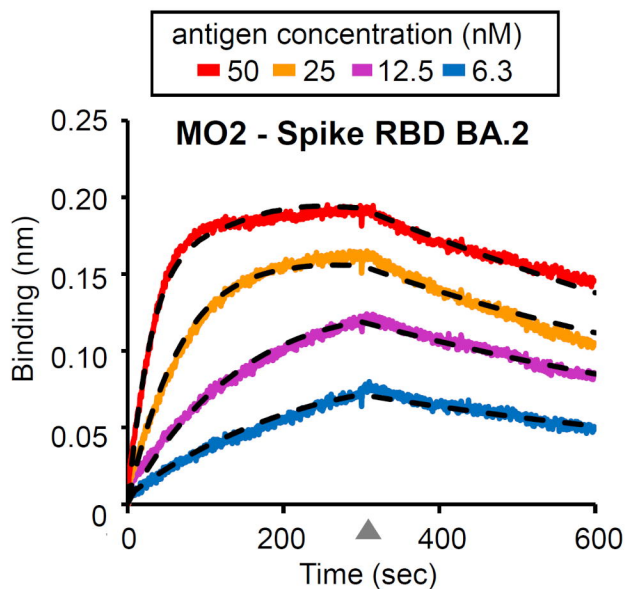**B**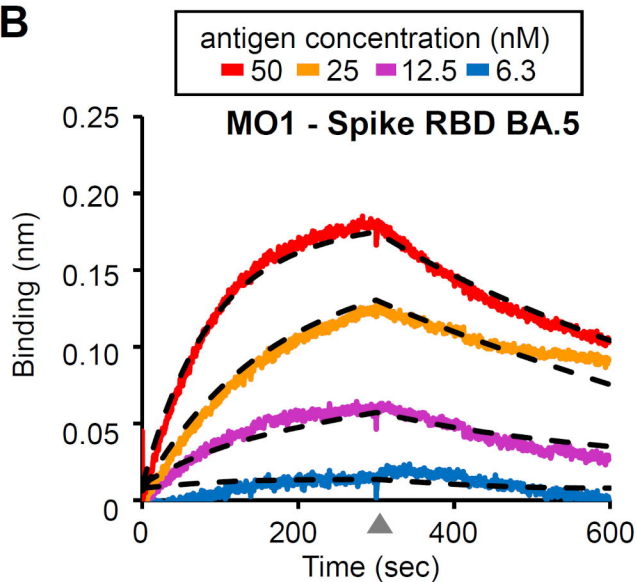**C**

| Ligand (antibody) | Analyte (antigen) | KD (M)               | Ka(1/Ms)          | kd(1/s)              | R <sup>2</sup> |
|-------------------|-------------------|----------------------|-------------------|----------------------|----------------|
| MO1               | Spike RBD BA.2    | $3.3 \times 10^{-9}$ | $5.3 \times 10^5$ | $1.9 \times 10^{-3}$ | 0.999          |
| MO1               | Spike RBD BA.5    | $1.1 \times 10^{-8}$ | $1.6 \times 10^5$ | $1.8 \times 10^{-3}$ | 0.987          |
| MO2               | Spike RBD BA.2    | $2.0 \times 10^{-9}$ | $5.5 \times 10^5$ | $1.1 \times 10^{-3}$ | 0.999          |
| MO2               | Spike RBD BA.5    | No binding           |                   |                      |                |
